# Supplementary material
Source: Springer Nature journal article supplement (https://www.springermedizin.de/resource/supplementary/13054_2013_2871_MOESM3_ESM.pdf/9714018)
Supplement: MOESM3 [file 9714018]

1,524 patients admitted to  
the ICU (level 1 & 2)  
between 10/05/2010 and  
13/11/2013

811 had an ICU stay of  
less than 48 hours

84 patients had no CPAx  
score within 24 hours of  
discharge from ICU

24 patients were  
transferred to another  
hospital for acute care

12 patients had an  
unclear discharge  
destination

94 patients lost due to  
compliance with  
completion of the CPAx  
score

n=499
